# Supplementary material
Source: MDPI journal article supplement (https://www.mdpi.com/2313-433X/7/1/5)
Supplement: s1 [file s1]

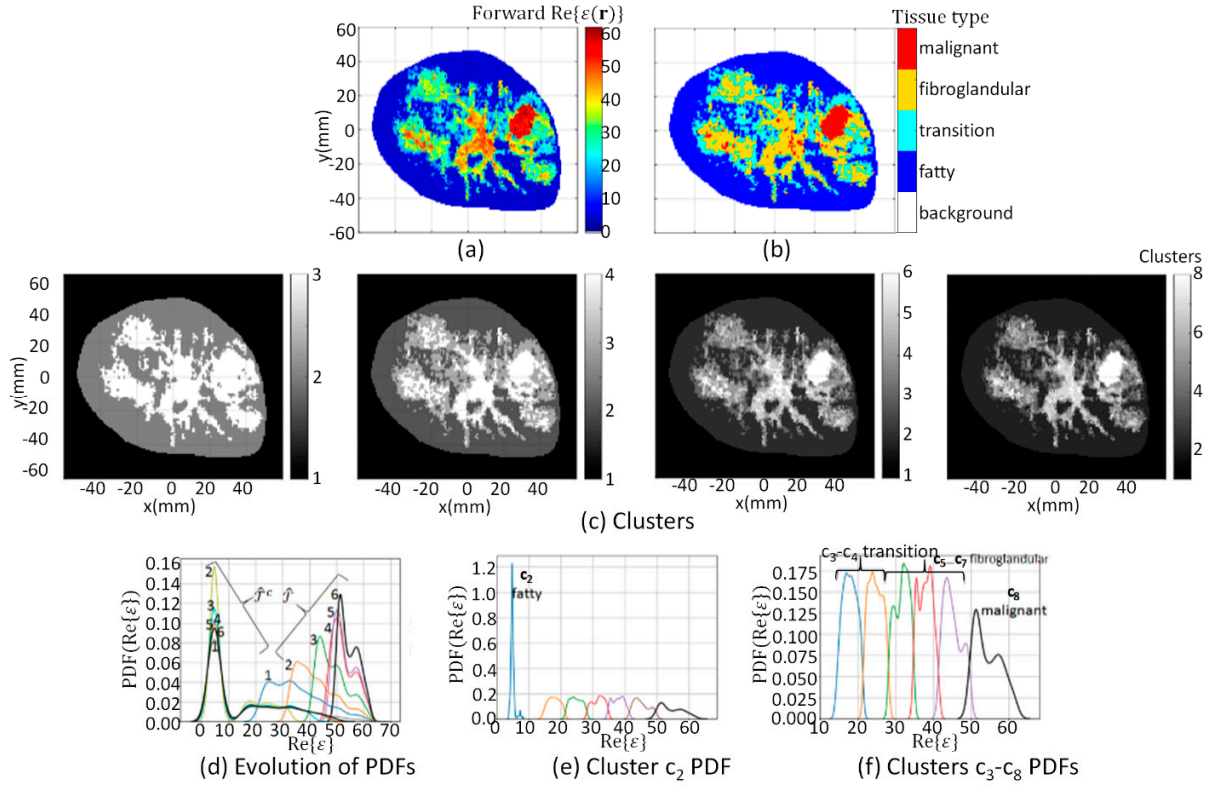

**Figure S1.** Model 1 forward model segmentation results. (a) Region  $\mathcal{R}$  extracted from forward model; (c) Evolution of clusters at  $k = 3, 4, 6,$  and  $8$ ; (d) Evolution of probability density function (PDF) over data within  $\mathcal{T}^c$  and  $\mathcal{T}$  where numbers indicate iteration; (e) PDF over data within cluster  $c_2$ , and (f) clusters  $c_3$  (blue line) to  $c_8$  (black line). Cluster  $c_2$  corresponds to fatty tissue,  $c_3 - c_4$  corresponds to transition tissue,  $c_5 - c_7$  fibroglandular tissues, and  $c_8$  corresponds to malignant tissue, which are mapped to segmentation masks leading to tissue type image (b).

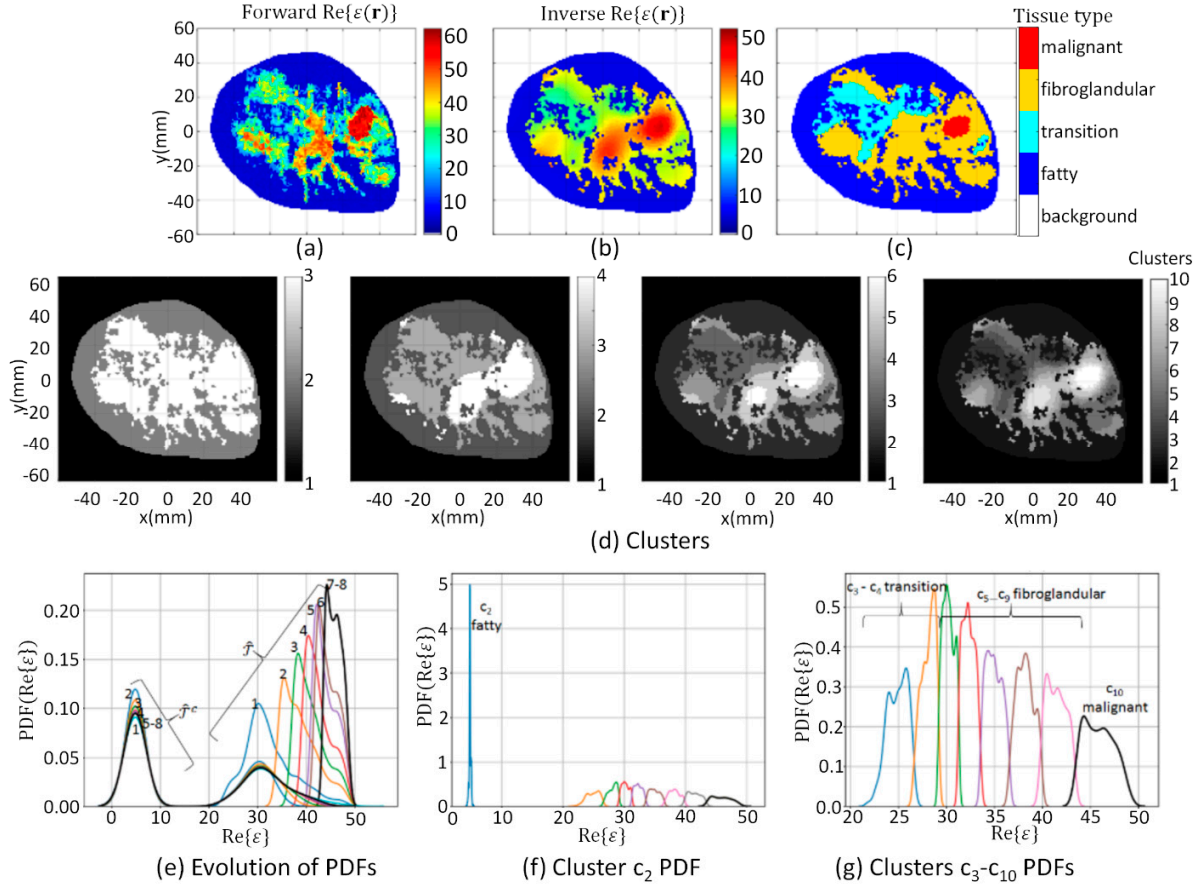

**Figure S2.** Case 3.1a Segmentation results of reconstruction derived from detailed internal structure prior-Real component. (a) Region  $\mathcal{R}$  extracted from forward model; (b) Region  $\mathcal{R}$  extracted from real component of inverse model; (d) Evolution of clusters at  $k=3, 4, 6,$  and  $10$ ; (e) Evolution of PDF over data within  $\hat{\mathcal{T}}^c$  and  $\hat{\mathcal{T}}$  where numbers indicate iteration; (f) PDF over data within cluster  $c_2$ , and (g) clusters  $c_3$  (blue line) to  $c_{10}$  (black line). Clusters  $c_3 - c_4$  corresponds to transition tissue,  $c_5 - c_9$  fibroglandular tissues, and  $c_{10}$  corresponds to malignant tissue, which are mapped to segmentation masks leading to tissue type image (b).

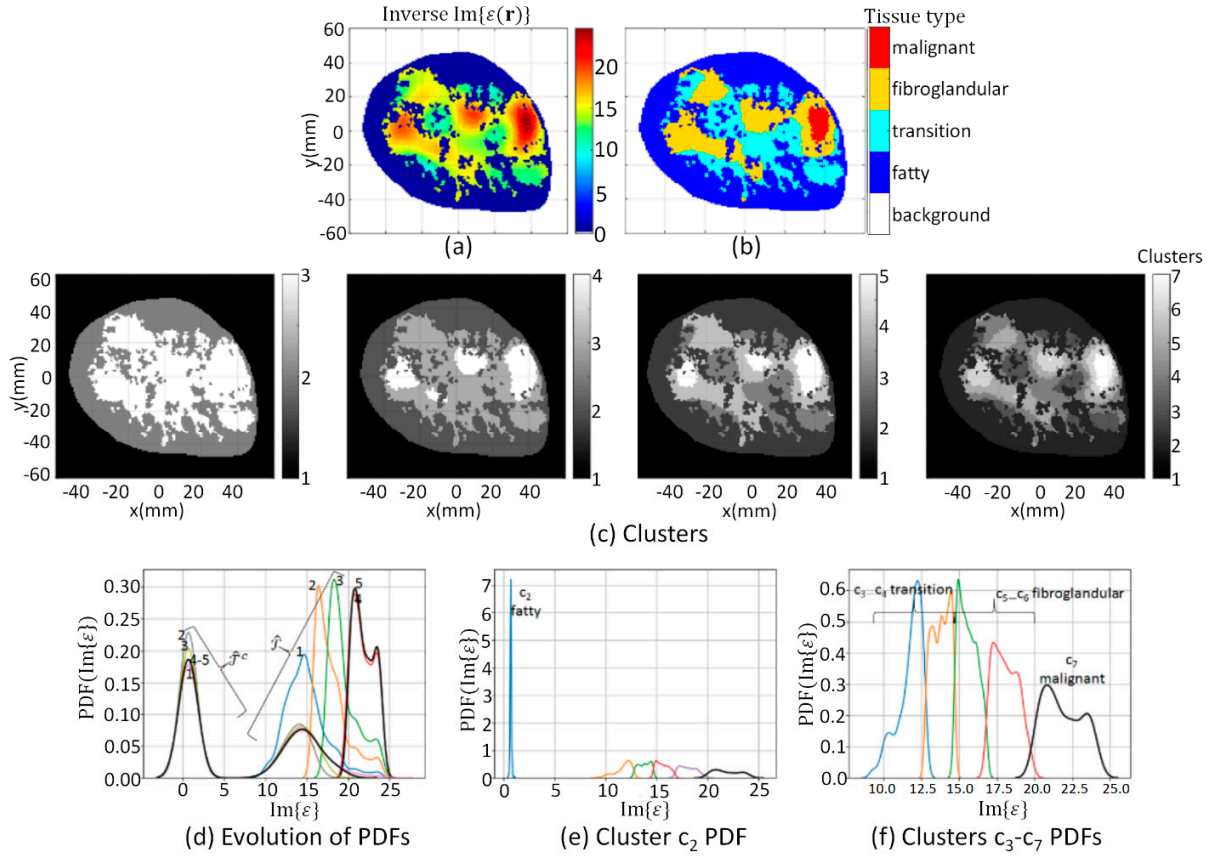

**Figure S3.** Case 3.1a Segmentation results of reconstruction derived from detailed internal structure prior- Imaginary component. (a) Region  $\mathcal{R}$  extracted from imaginary component of inverse model; (c) Evolution of clusters at  $k = 3, 4, 5$ , and  $7$ ; (d) Evolution of PDF over data within  $\hat{\mathcal{T}}^c$  and  $\hat{\mathcal{T}}$  where numbers indicate iteration; (e) PDF over data within cluster  $c_2$ , and (f) clusters  $c_3$  (blue line) to  $c_7$  (black line). Clusters  $c_3 - c_4$  corresponds to transition tissue,  $c_5 - c_6$  fibroglandular tissues, and  $c_7$  corresponds to malignant tissue, which are mapped to segmentation masks leading to tissue type image (b).

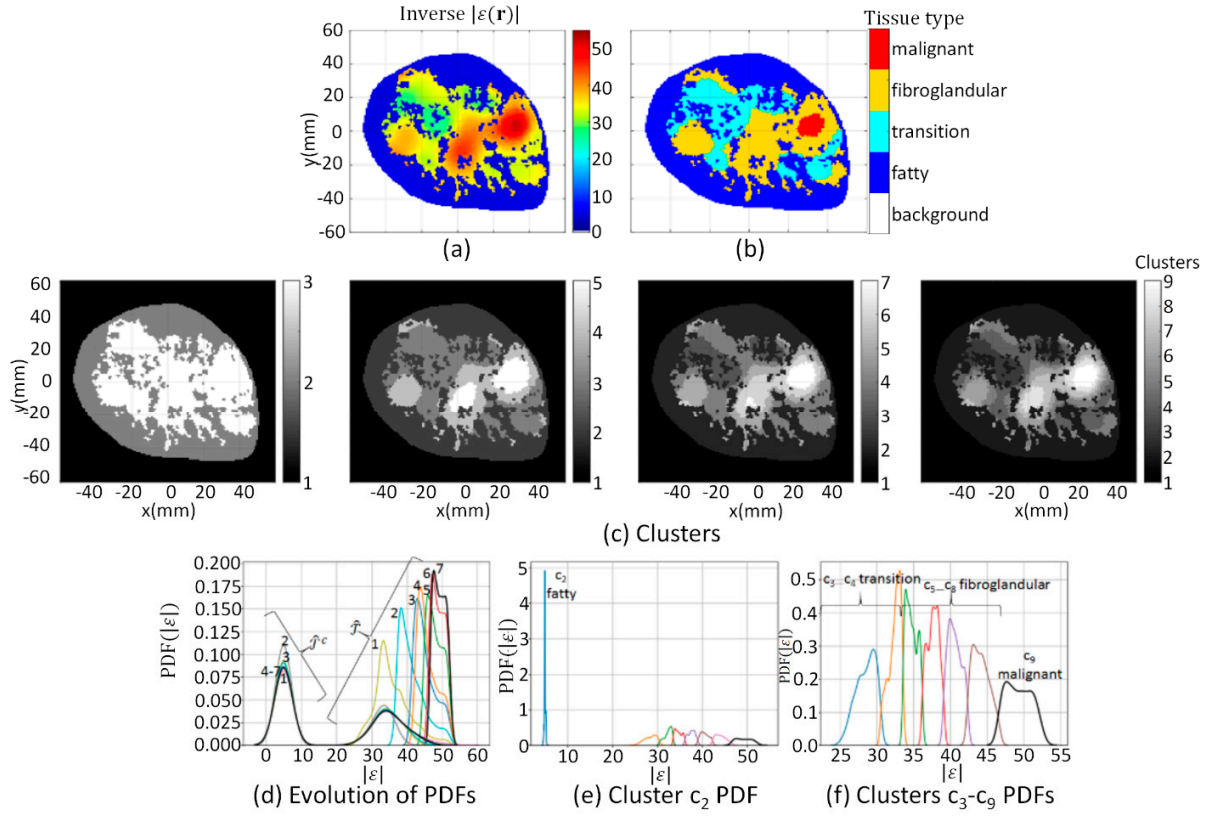

**Figure S4.** Case 3.1a Segmentation results of reconstruction derived from detailed internal structure prior-Magnitude. (a) Region  $\mathcal{R}$  extracted from magnitude of inverse model complex permittivity; (c) Evolution of clusters at  $k = 3, 5, 7$ , and 9; (d) Evolution of PDF over data within  $\hat{\mathcal{T}}^c$  and  $\hat{\mathcal{T}}$  where numbers indicate iteration; (e) PDF over data within cluster  $c_2$ , and (f) clusters  $c_3$  (blue line) to  $c_9$  (black line). Clusters  $c_3 - c_4$  corresponds to transition tissue,  $c_5 - c_8$  fibroglandular tissues, and  $c_9$  corresponds to malignant tissue, which are mapped to segmentation masks leading to tissue type image (b).

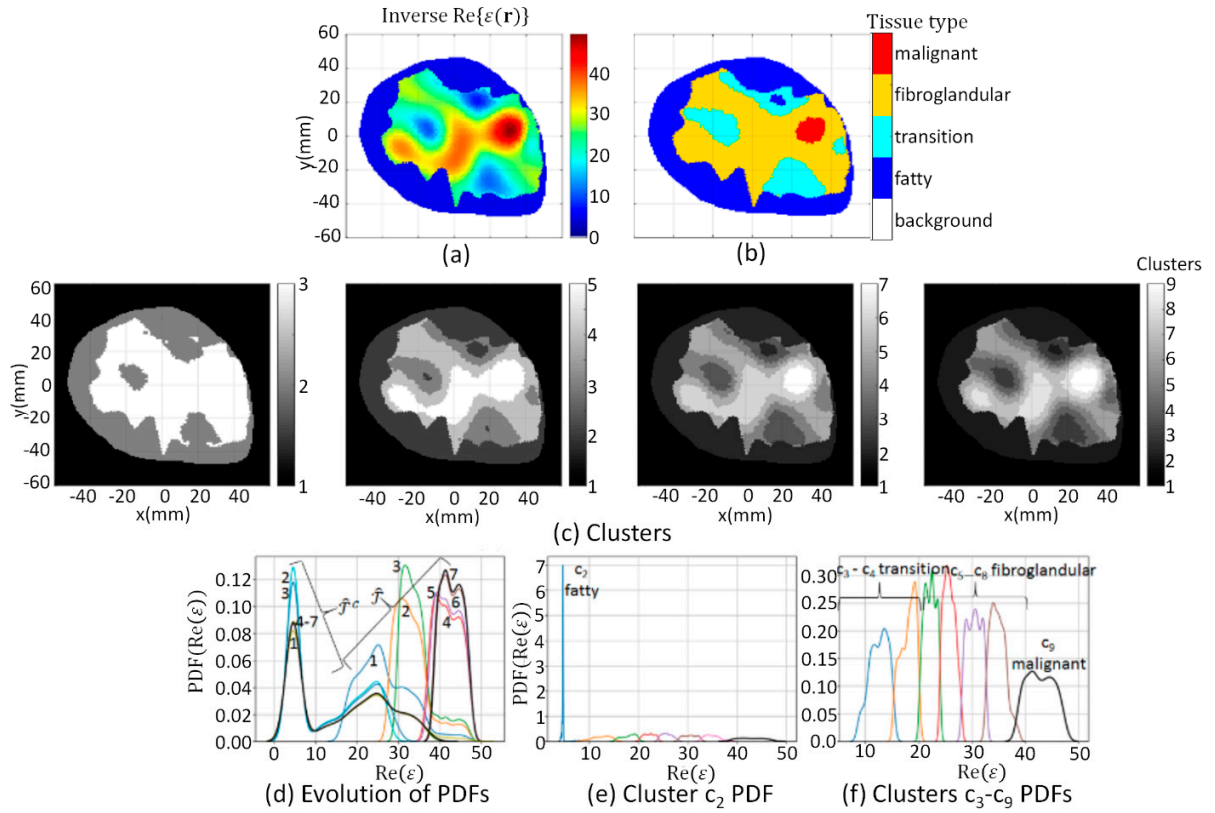

**Figure S5.** Case 3.1b Segmentation results of reconstruction derived from regional internal structure prior-Real component. (a) Region  $\mathcal{R}$  extracted from real component of inverse model; (c) Evolution of clusters at  $k=3, 5, 7$ , and  $9$ ; (d) Evolution of PDF over data within  $\hat{\mathcal{T}}^c$  and  $\hat{\mathcal{T}}$  where numbers indicate iteration; (e) PDF over data within cluster  $c_2$ , and (f) clusters  $c_3$  (blue line) to  $c_9$  (black line). Clusters  $c_3 - c_4$  corresponds to transition tissue,  $c_5 - c_8$  fibroglandular tissues, and  $c_9$  corresponds to malignant tissue, which are mapped to segmentation masks leading to tissue type image (b).

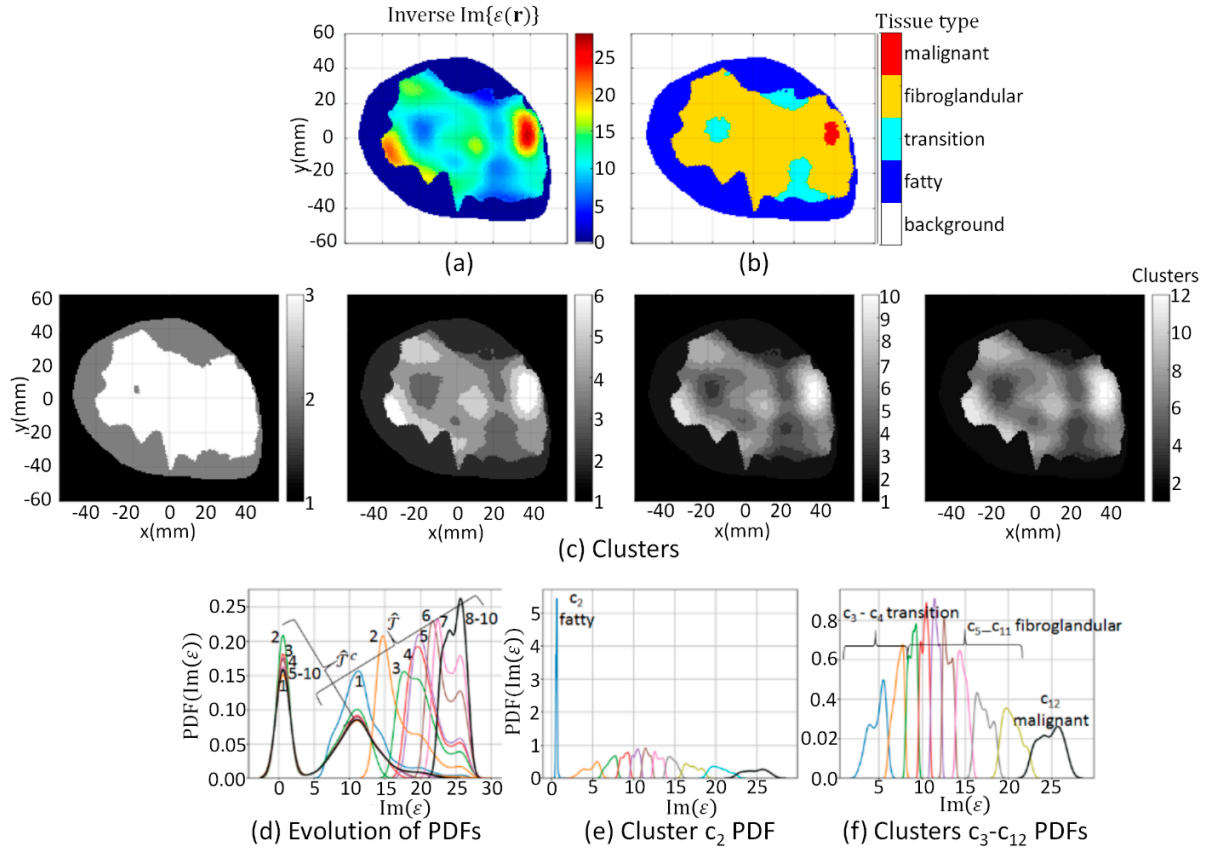

**Figure S6.** Case 3.1b Segmentation results of reconstruction derived from regional internal structure prior-Imaginary component. (a) Region  $\mathcal{R}$  extracted from imaginary component of inverse model; (c) Evolution of clusters at  $k=3, 6, 10,$  and  $12$ ; (d) Evolution of PDF over data within  $\hat{\mathcal{T}}^c$  and  $\hat{\mathcal{T}}$  where numbers indicate iteration; (e) PDF over data within cluster  $c_2$ , and (f) clusters  $c_3$  (blue line) to  $c_{12}$  (black line). Clusters  $c_3 - c_4$  corresponds to transition tissue,  $c_5 - c_{11}$  fibroglandular tissues, and  $c_{12}$  corresponds to malignant tissue, which are mapped to segmentation masks leading to tissue type image (b).

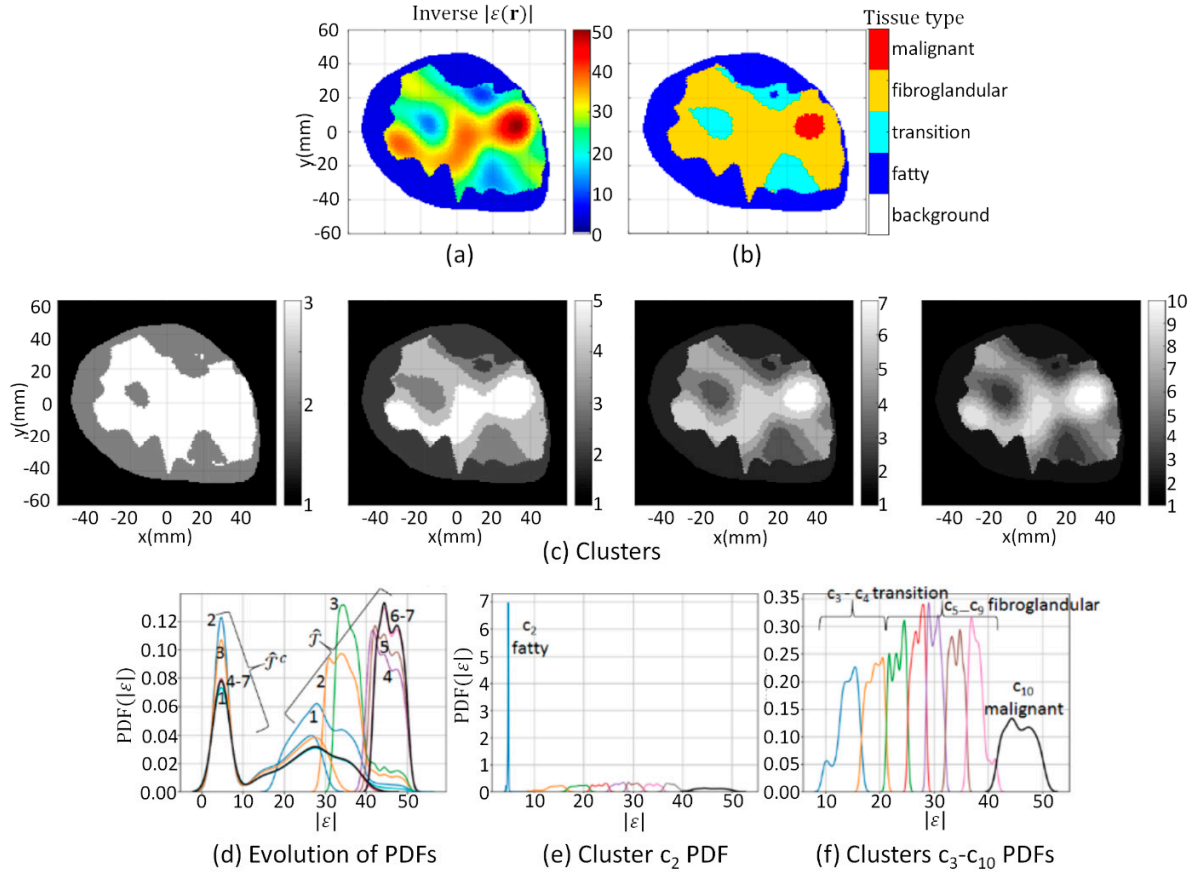

**Figure S7.** Case 3.1b Segmentation results of reconstruction derived from regional internal structure prior-Magnitude. (a) Region  $\mathcal{R}$  extracted from magnitude of inverse model complex permittivity; (c) Evolution of clusters at  $k = 3, 5, 7$ , and 10; (d) Evolution of PDF over data within  $\hat{T}^c$  and  $\hat{T}$  where numbers indicate iteration; (e) PDF over data within cluster  $c_2$ , and (f) clusters  $c_3$  (blue line) to  $c_{10}$  (black line). Clusters  $c_3 - c_4$  corresponds to transition tissue,  $c_5 - c_9$  fibroglandular tissues, and  $c_{10}$  corresponds to malignant tissue, which are mapped to segmentation masks leading to tissue type image (b).



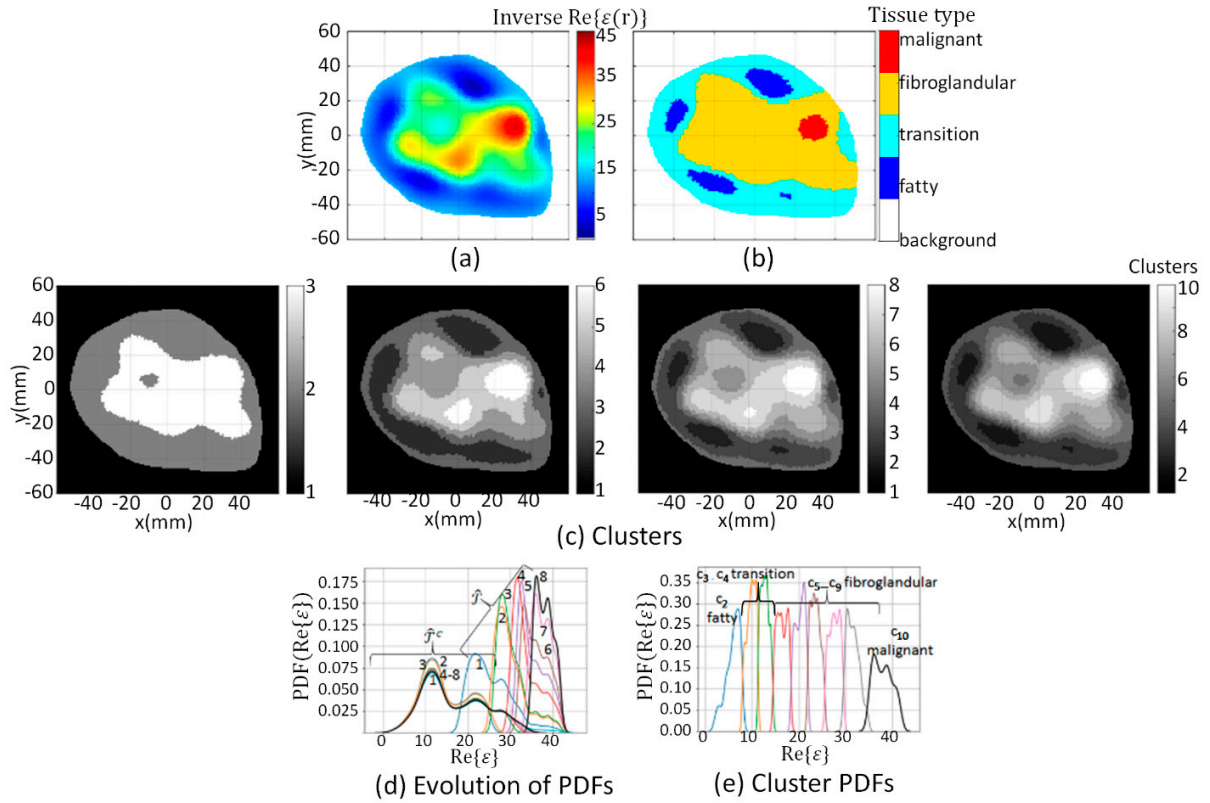

**Figure S8.** Case 3.1c Segmentation results of reconstruction derived from skin region prior-Real component. (a) Region  $\mathcal{R}$  extracted from real component of inverse model; (c) Evolution of clusters at  $k = 3, 6, 8$ , and  $10$ ; (d) Evolution of PDF over data within  $\hat{T}^c$  and  $\hat{T}$  where numbers indicate iteration; (e) PDF over data within clusters  $c_2$  (blue line) to  $c_{10}$  (black line). Cluster  $c_2$  corresponds to fatty tissue,  $c_3 - c_4$  transition tissue,  $c_5 - c_9$  fibroglandular tissues, and  $c_{10}$  corresponds to malignant tissue, which are mapped to segmentation masks leading to tissue type image (b).



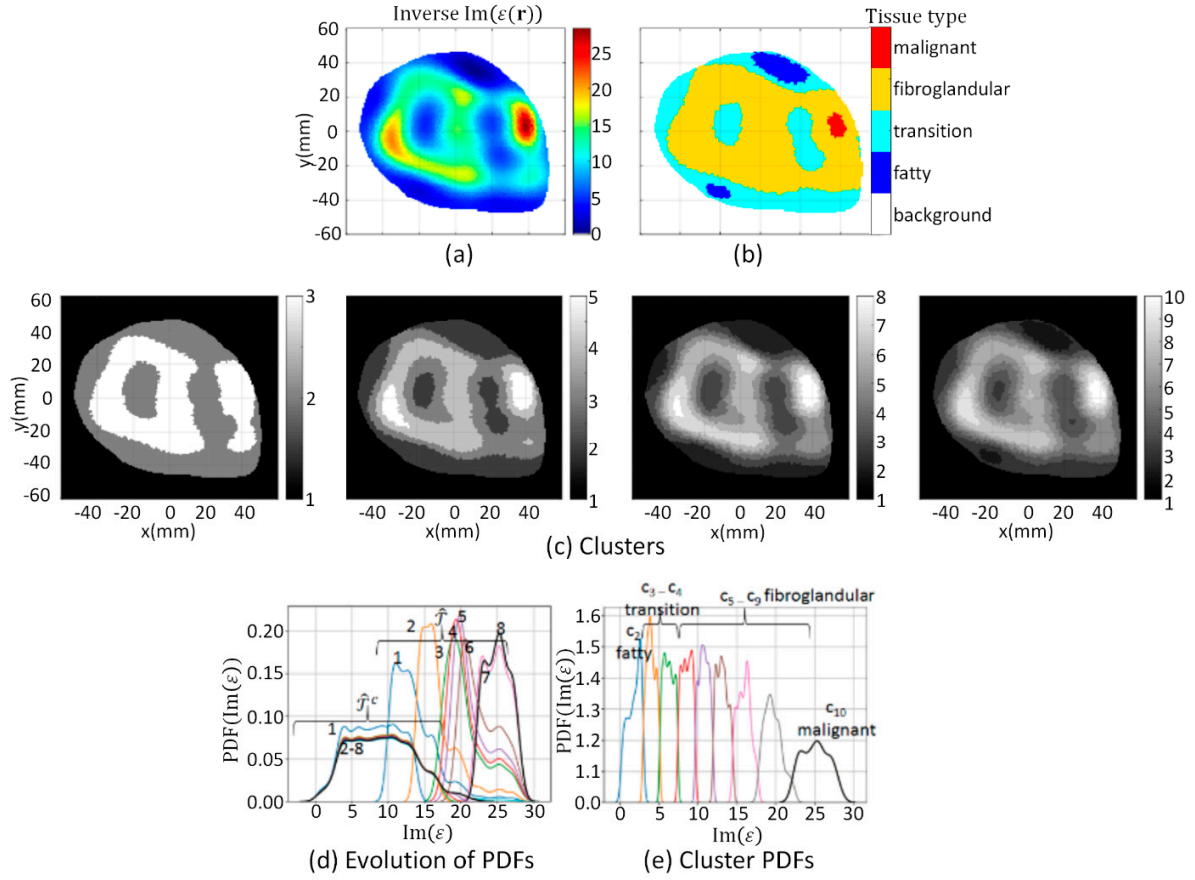

**Figure S9.** Case 3.1c Segmentation results of reconstruction derived from skin region prior-Imaginary component. (a) Region  $\mathcal{R}$  extracted from imaginary component of inverse model; (c) Evolution of clusters at  $k = 3, 5, 8, \text{ and } 10$ ; (d) Evolution of PDF over data within  $\hat{T}^c$  and  $\hat{T}$  where numbers indicate iteration; (e) PDF over data within clusters  $c_2$  (blue line) to  $c_{10}$  (black line). Cluster  $c_2$  corresponds to fatty tissue,  $c_3 - c_4$  transition tissue,  $c_5 - c_9$  fibroglandular tissues, and  $c_{10}$  corresponds to malignant tissue, which are mapped to segmentation masks leading to tissue type image (b).

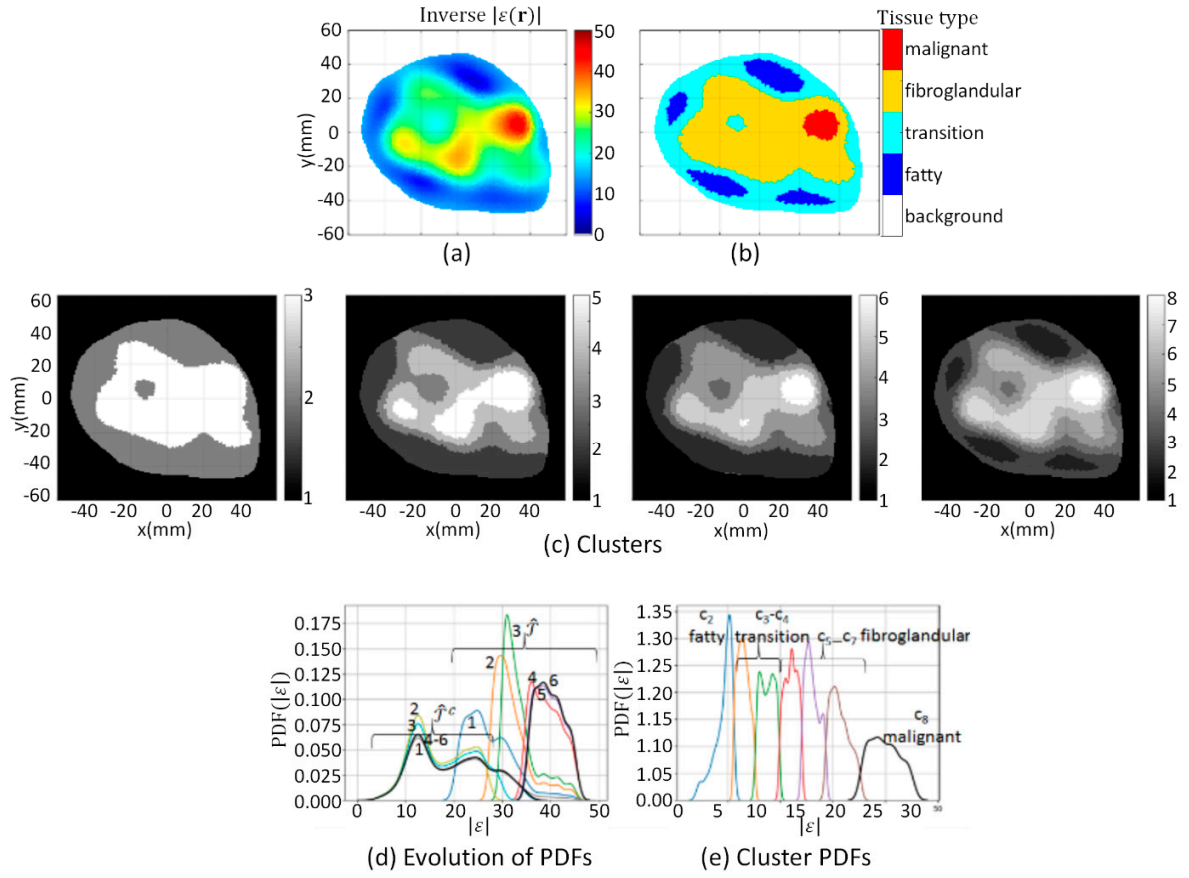

**Figure S10.** Case 3.1c Segmentation results of reconstruction derived from skin region prior-Magnitude. (a) Region  $\mathcal{R}$  extracted from magnitude of inverse model complex permittivity; (c) Evolution of clusters at  $k = 3, 5, 6, \text{ and } 8$ ; (d) Evolution of PDF over data within  $\hat{T}^c$  and  $\hat{T}$  where numbers indicate iteration; (e) PDF over data within clusters  $c_2$  (blue line) to  $c_8$  (black line). Cluster  $c_2$  corresponds to fatty tissue,  $c_3 - c_4$  transition tissue,  $c_5 - c_7$  fibroglandular tissues, and  $c_8$  corresponds to malignant tissue, which are mapped to segmentation masks leading to tissue type image (b).
